# Supplementary material for: Gold nanoparticle cluster–plasmon-enhanced fluorescent silica core–shell nanoparticles for X-ray computed tomography–fluorescence dual-mode imaging of tumors
Source: Royal Society of Chemistry journal article supplement (doi:10.1039/c3cc41876f), 2013-01-01
Supplement: c3cc41876f.pdf [file c3cc41876f.pdf]

Electronic Supplementary Information (ESI)

**Gold nanoparticle cluster/plasmon-enhanced fluorescent silica  
core-shell nanoparticles for X-ray computed  
tomography/fluorescence dual-mode imaging of tumors**

**Koichiro Hayashi,<sup>\*a</sup> Michihiro Nakamura,<sup>a</sup> Hirokazu Miki,<sup>b</sup> Shuji Ozaki,<sup>c</sup>**

**Masahiro Abe,<sup>d</sup> Toshio Matsumoto<sup>d</sup> and Kazunori Ishimura<sup>a</sup>**

*<sup>a</sup>Department of Anatomy and Cell Biology, Institute of Health Biosciences, The  
University of Tokushima Graduate School, 3-18-15 Kuramoto-cho, Tokushima,  
770-8503, Japan.*

*E-mail: khayashi@basic.med.tokushima-u.ac.jp.*

*<sup>b</sup>Division of Transfusion Medicine, Tokushima University Hospital, 2-50-1  
Kuramoto-cho, Tokushima, 770-0042, Japan.*

*<sup>c</sup>Department of Internal Medicine, Tokushima Prefectural Central Hospital, 1-10-3  
Kuramoto-cho, Tokushima, 770-0042, Japan*

*<sup>d</sup>Department of Medicine and Bioregulatory Sciences, The University of Tokushima  
Graduate School of Medical Sciences, 3-18-15 Kuramoto-cho, Tokushima, 770-8503,  
Japan.*

## Experimental Section

### *Ethics statement*

The study protocol was approved by the Animal Use Committee of the University of Tokushima (Tokushima, Japan).

### *Materials*

Tetrakis(4-carboxyphenyl)porphyrin (TCPP), tetraethoxysilane (TEOS), and 3-aminopropyltriethoxysilane (APTES) were purchased from Tokyo Chemical Industry (Tokyo, Japan). Ammonia water (28%) was obtained from Kishida Chemical (Osaka, Japan). H<sub>2</sub>AuCl<sub>4</sub>, trisodium citrate, NaBH<sub>4</sub> and 80-nm gold NPs were purchased from Sigma–Aldrich (St Louis, MO, USA).

### *Synthesis of 7-nm gold NPs*

Gold NPs were synthesized using the method reported by Gole et al.<sup>22</sup> Typically, a 20 mL aqueous solution containing  $2.5 \times 10^{-4}$  M H<sub>2</sub>AuCl<sub>4</sub> and  $2.5 \times 10^{-4}$  M trisodium citrate was prepared; 0.6 mL of ice-cold 0.1 M NaBH<sub>4</sub> was added to the solution, and the resulting mixture stirred at room temperature for 24 h. Gold NPs were

collected by centrifugation (20,000×g) of this dispersion, and re-dispersion in water.

This sequence was repeated thrice.

#### *Preparation of porphyrin-containing silicon alkoxide*

The preparation and structural analyses of porphyrin-containing silicon alkoxide was undertaken as described previously.<sup>21</sup>

#### *Synthesis of c-Au@SiO<sub>2</sub> NPs*

Porphyrin-containing silicon alkoxide ( $2.5 \times 10^{-3}$  M), TEOS ( $8.0 \times 10^{-3}$  M), and APTES ( $7.5 \times 10^{-3}$  M) were added to the solution containing 7-nm gold NPs ( $8.3 \times 10^{-4}$  M). A total of 6 mL of ammonia water (28%) was added to this solution, which was then stirred at room temperature for 24 h. c-Au@SiO<sub>2</sub> NPs were collected by centrifugation of this dispersion, and re-dispersion in water. This sequence was repeated thrice.

#### *Synthesis of s-Au@SiO<sub>2</sub> NPs*

Porphyrin-containing silicon alkoxide ( $2.5 \times 10^{-3}$  M), TEOS ( $8.0 \times 10^{-3}$  M), and APTES ( $7.5 \times 10^{-3}$  M) were added to a solution containing 80-nm gold NPs ( $8.3 \times 10^{-4}$

M). A total of 6 mL of ammonia water (28%) was added to this solution, which was then stirred at room temperature for 24 h. c-Au@SiO<sub>2</sub> NPs were collected by centrifugation of this dispersion, and re-dispersion in water. This sequence was repeated thrice.

### *Animals*

Female CB17/Icr-Prkdc<sup>scid</sup> mice (4 weeks of age) were purchased from Charles River Laboratories (Yokohama, Japan) and maintained in a specific pathogen-free facility in our Animal Resources Center. To eradicate residual natural killer cells, mice were injected (i.p.) with 10 µL of rabbit anti-asialo GM1 antiserum (Wako Pure Chemicals, Osaka, Japan) 1 day before tumor inoculation.<sup>23</sup> **Inoculation with human myeloma cells (5×10<sup>6</sup> cells) was accomplished via subcutaneous injection into the backs of the mice. PEGylated c-Au@SiO<sub>2</sub> NPs were injected into mice with tumors of diameter 100 mm<sup>3</sup>. Tumor volumes were calculated from the formula**

$$V = AB^2\pi/6,$$

**where A is the longer and B is the shorter lateral diameter of the tumor.**

### *Characterization*

The morphology and size of 7-nm gold NPs, s-Au@SiO<sub>2</sub> NPs, and c-Au@SiO<sub>2</sub> NPs were studied using transmission electron microscopy (TEM) with a Hitachi H-760 machine (Hitachi, Tokyo, Japan). The hydrodynamic diameter and zeta potential of 7-nm gold NPs, c-Au@SiO<sub>2</sub> NPs and PEGylated c-Au@SiO<sub>2</sub> NPs were measured in PBS, using dynamic light scattering (DLS, NICOMP 380 ZLS, Showa Denko, Tokyo, Japan). The absorption bands of c-Au@SiO<sub>2</sub> NPs, s-Au@SiO<sub>2</sub> NPs, TCPP, 80-nm gold NPs and 7-nm gold NPs were measured using an ultraviolet–visible (UV-vis) spectrophotometer (U-3000, Hitachi, Tokyo, Japan). Fluorescence properties were characterized using a fluorescence spectrophotometer (F-2500, Hitachi, Tokyo, Japan). The quantum yield of c-Au@SiO<sub>2</sub> NPs were estimated from the fluorescence spectra of TCPP and c-Au@SiO<sub>2</sub> NPs based on the quantum yield of TCPP (0.044). (Chen et al. *Eur. J. Inorg. Chem.* **2009**, 5494–5505) Porphyrin contents in c-Au@SiO<sub>2</sub> NPs and s-Au@SiO<sub>2</sub> NPs were measured by thermogravimetry (TG, Rigaku, TG 8120, Tokyo, Japan).

### CT

CT images of c-Au@SiO<sub>2</sub> NPs and Iopamiron in water, as well as mice injected intravenously with PEGylated c-Au@SiO<sub>2</sub> NPs (15 mg/kg), were obtained using the Aloka Latheta LCT-200 system (Hitachi, Tokyo, Japan) (*n* = 5 per cohort).

The imaging parameters were as follows: pixel size, 96; thickness, 192  $\mu\text{m}$ ; pitch, 192  $\mu\text{m}$ . CT images were obtained using OsiriX (ver3.8.1; 32 bit; OsiriX foundation, Geneva, Switzerland). CT values were estimated using the region of interest (ROI) tool.

#### *In vivo fluorescence imaging*

Fluorescence images of the mice injected intravenously with PEGylated c-Au@SiO<sub>2</sub> NPs (300  $\mu\text{g}/\text{mouse}$ ) were obtained at  $\lambda_{\text{ex}} = 675 \text{ nm}$  and  $\lambda_{\text{em}} = 740 \text{ nm}$ , using the IVIS<sup>®</sup> 200 Imaging System (Caliper Life Sciences, Hopkinton, MA, USA) (n = 5 per cohort). The fluorescence intensities were estimated using the ROI tool.

#### *Histological Analyses*

Tumors were extracted from mice 24 h after intravenous injection of PEGylated c-Au@SiO<sub>2</sub> NPs. Tumor tissue samples obtained for histology were immediately immersed in 4% paraformaldehyde solution for 24 h. Fixed tissues were encased in paraffin blocks. Tissue sections (2  $\mu\text{m}$ ) were cut from paraffin blocks and affixed to Superfrost Microscopy Slides. Hematoxylin and eosin (H&E) staining of tissue sections was carried out in a conventional manner. The bright-field images of H&E stained sections and the fluorescence images of unstained sections were obtained

using Nikon E800 microscope ( $\lambda_{\text{ex}} = 408 \text{ nm}$ ,  $\lambda_{\text{em}} = 480/25 \text{ nm}$  and  $605/75 \text{ nm}$ , Nikon, Tokyo, Japan).

#### *Toxicity evaluation*

PBS and PEGylated c-Au@SiO<sub>2</sub> NPs (300  $\mu\text{g}/\text{mouse}$ ) were injected intravenously into mice ( $n = 5$  per cohort). One month after injection, blood samples were collected, and serum obtained by centrifugation of whole blood at 3,000 rpm for 15 min. Liver function was evaluated based on the serum levels of alkaline phosphatase (ALP), alanine aminotransferase (ALT), and aspartate aminotransferase (AST). Nephrotoxicity was determined by blood urea nitrogen (BUN). These biochemical parameters were determined using an automated biochemical analyzer (7180, Hitachi).

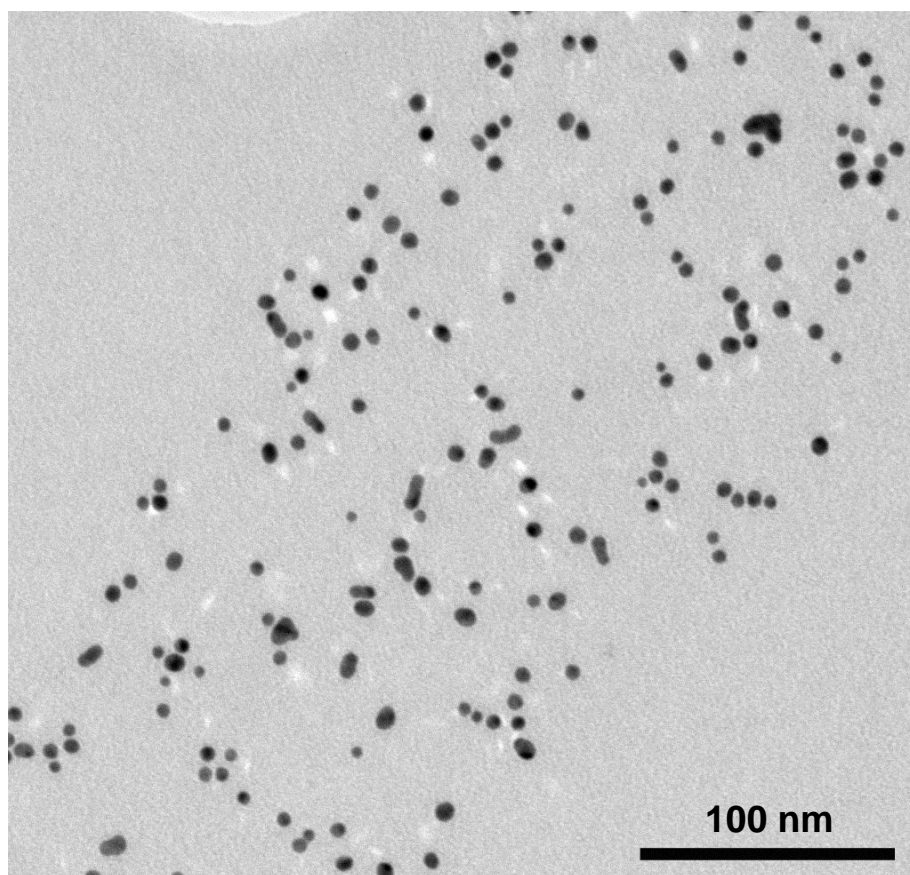

**Fig. S1** TEM image of 7 nm-gold NPs.



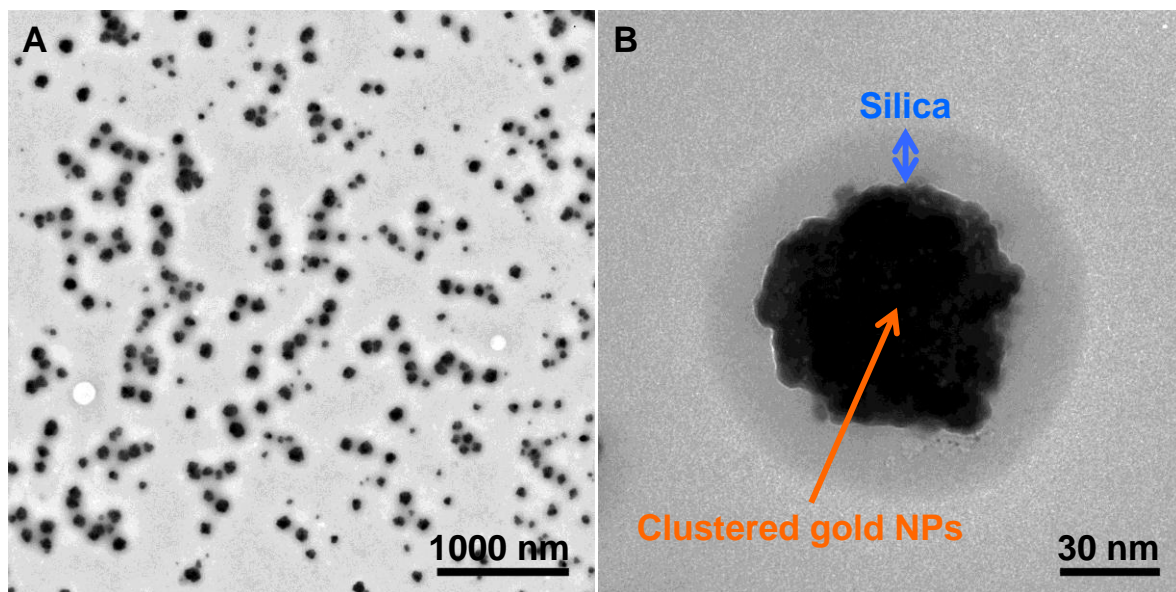

**Fig. S2** (A) TEM image of c-Au@SiO<sub>2</sub> NPs. (B) Close-up image of Fig. S2A.

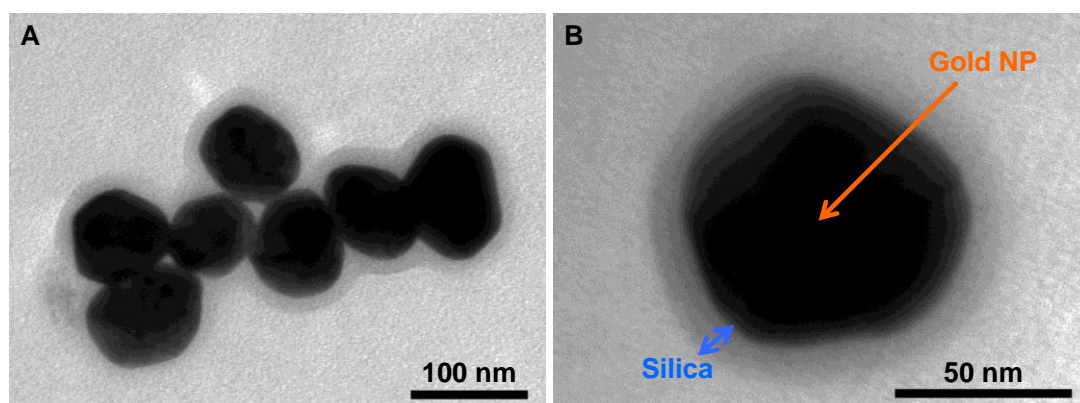

**Fig. S3** (A) TEM image of s-Au@SiO<sub>2</sub> NPs. (B) Close-up image of Figure S3A.

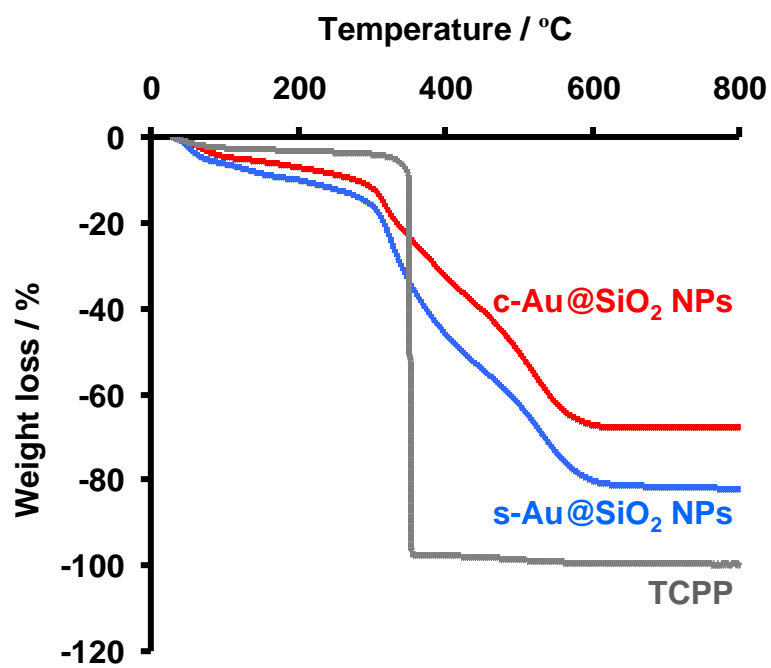

**Fig. S4** TG curves of TCPP, s-Au@SiO<sub>2</sub> NPs and c-Au@SiO<sub>2</sub> NPs.

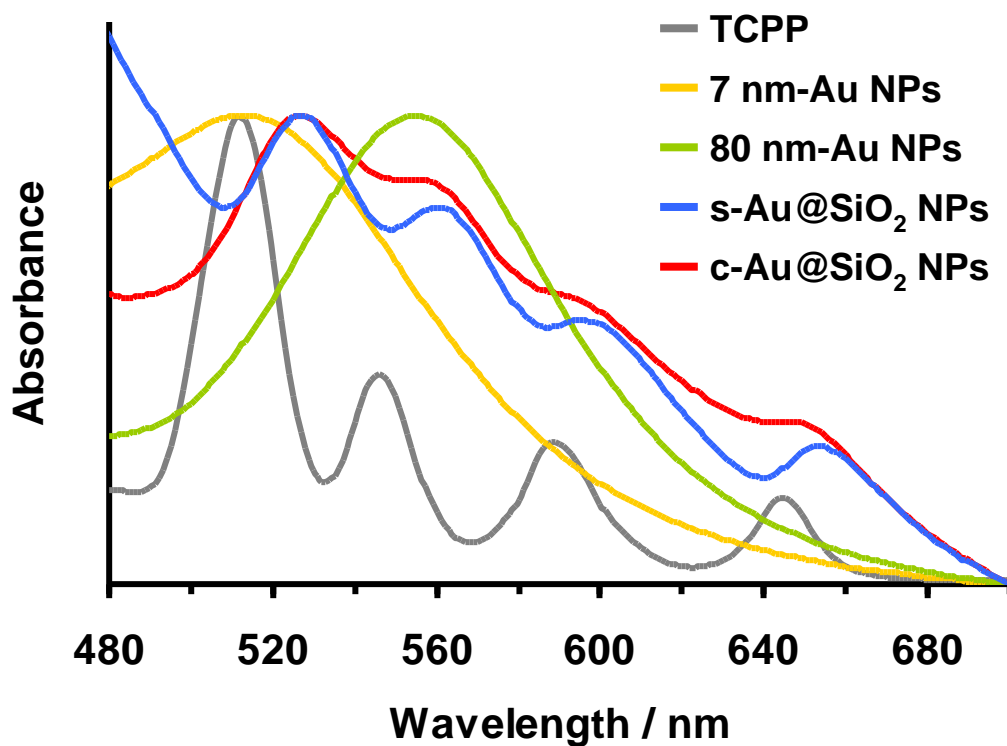

**Fig. S5** Absorption spectra of 7 nm-gold NPs, 80 nm-gold NPs, TCPP, s-Au@SiO<sub>2</sub> NPs and c-Au@SiO<sub>2</sub> NPs.

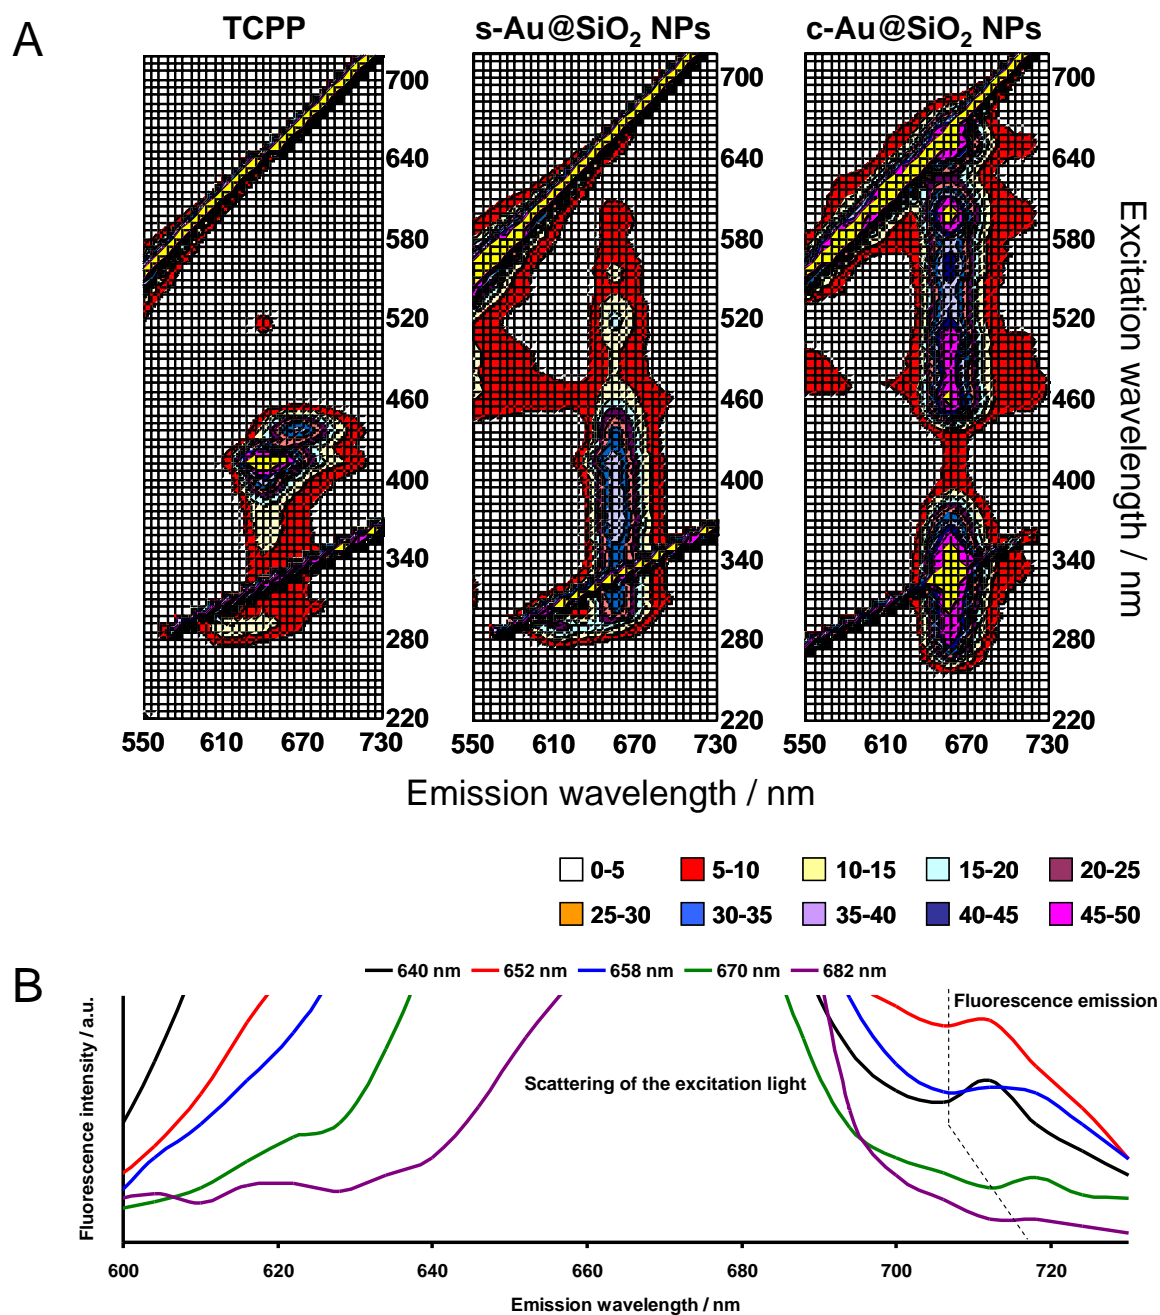

**Fig. S6** Fluorescence properties of TCPP, s-Au@SiO<sub>2</sub> NPs and c-Au@SiO<sub>2</sub> NPs. (A) 3D fluorescence spectra of TCPP, s-Au@SiO<sub>2</sub> NPs and c-Au@SiO<sub>2</sub> NPs. (B) The fluorescence spectra of c-Au@SiO<sub>2</sub> NPs at  $\lambda_{\text{ex}}$  of 640, 652, 658, 670 and 682 nm.

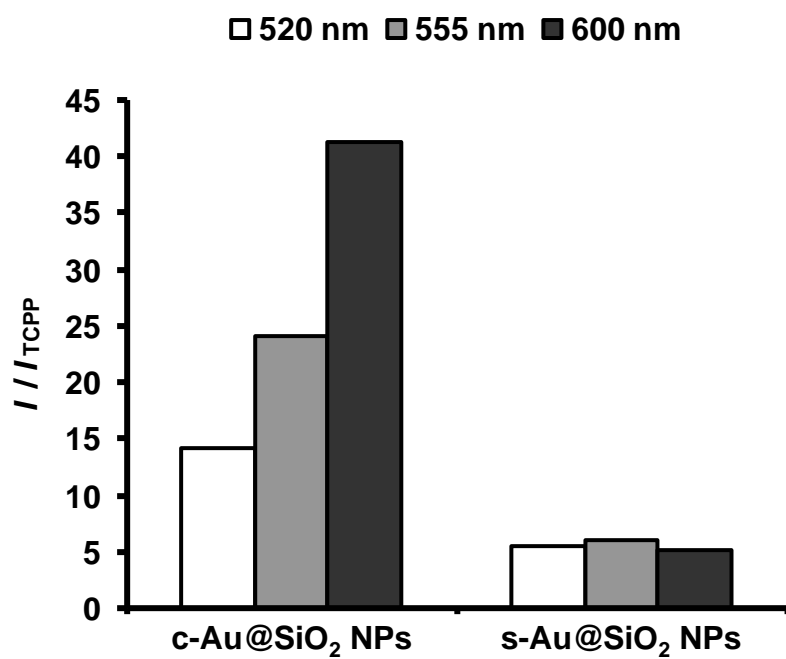

**Fig. S7**  $I/I_{\text{TCPP}}$  of c-Au@SiO<sub>2</sub> NPs and s-Au@SiO<sub>2</sub> NPs at  $\lambda_{\text{em}}$  of 660 nm and  $\lambda_{\text{ex}}$  of 520, 555 and 600 nm

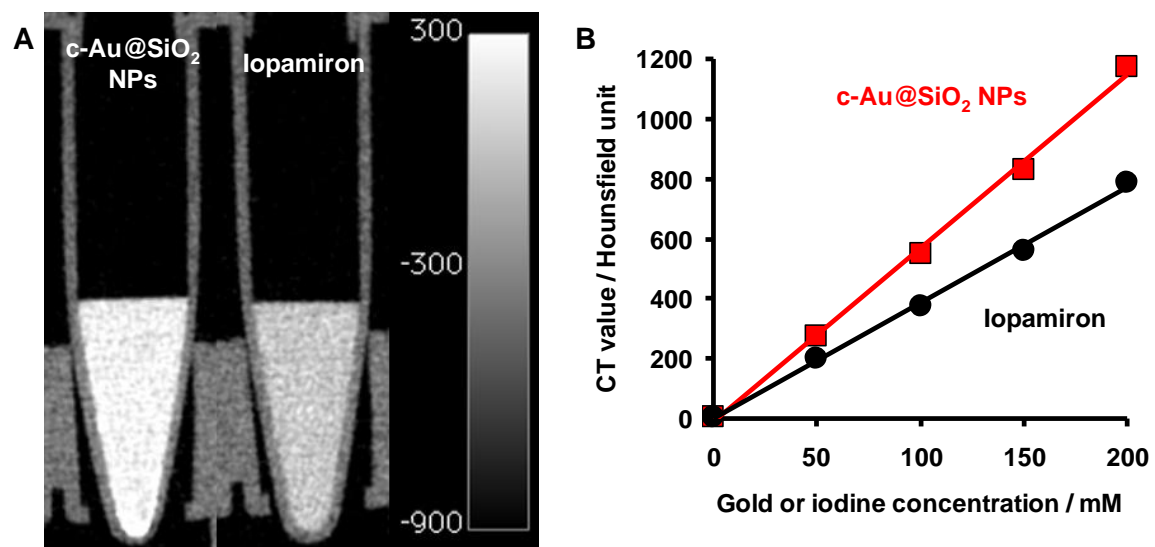

**Fig. S8** (A) CT image of c-Au@SiO<sub>2</sub> NPs and Iopamiron in water (50 mM). (B) CT values of c-Au@SiO<sub>2</sub> NPs and Iopamiron at 0–200 mM.

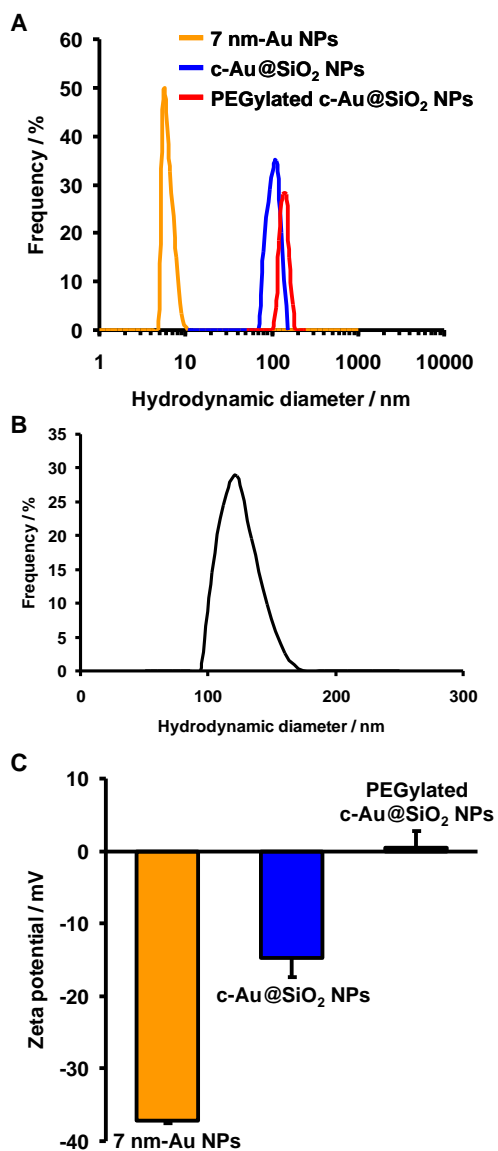

**Fig. S9** (A) DLS curves for 7 nm-gold NPs, c-Au@SiO<sub>2</sub> NPs and PEGylated c-Au@SiO<sub>2</sub> NPs. (B) DLS curves for PEGylated c-Au@SiO<sub>2</sub> NPs a month after synthesis. (C) zeta potential for 7 nm-gold NPs, c-Au@SiO<sub>2</sub> NPs and PEGylated c-Au@SiO<sub>2</sub> NPs.



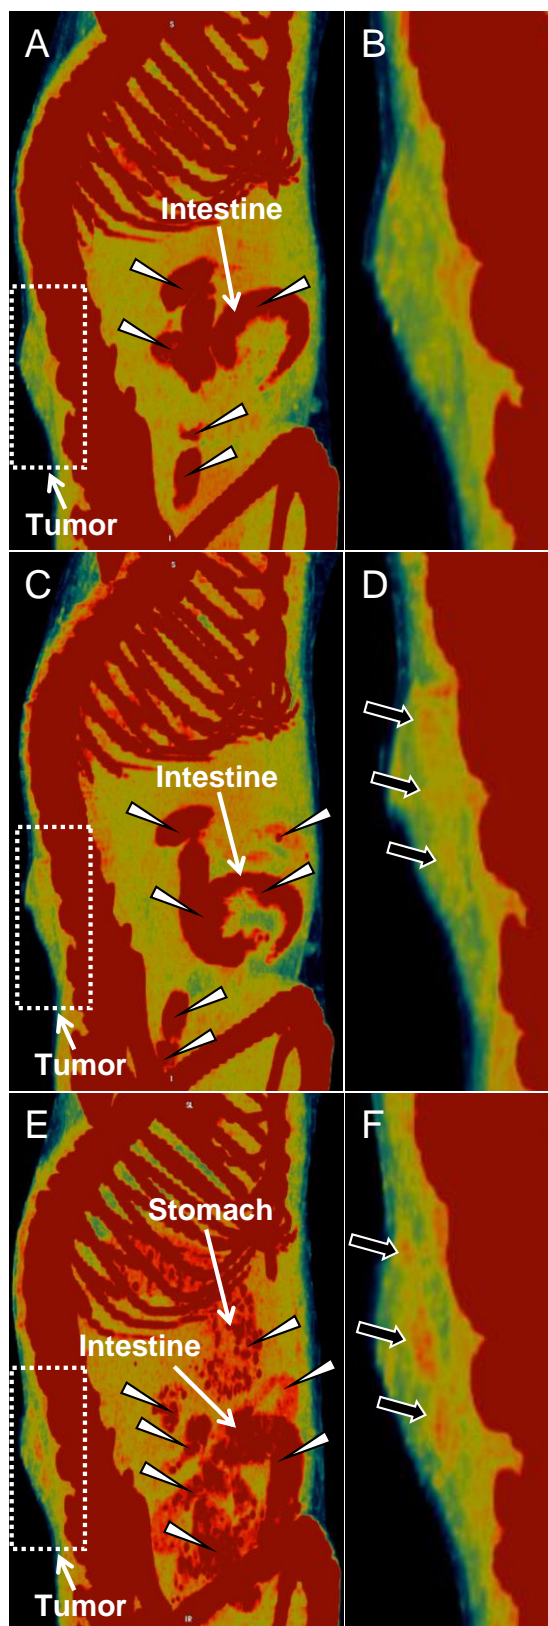

**Fig. S10** CT images of tumor-bearing mouse injected intravenously with PEGylated  $c\text{-Au@SiO}_2$  NPs: (A) pre-injection, (B) close-up image of the tumor shown in Fig. S10A, (C) 3 h after injection, (D) close-up image of the tumor shown in Fig. S10C, (E) 24 h after injection, (F) close-up image of the tumor shown in Fig. S10E. White triangles indicate food matter that absorbed X-rays.

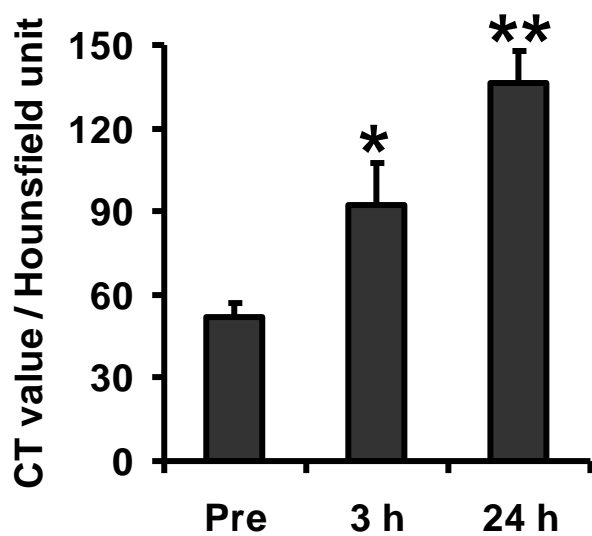

**Fig. S11** CT values in the tumor pre-injection, at 3 h post-injection, and at 24 h post-injection. Statistical significance ( $p$ ) was calculated using a comparison between the values for pre-injection, and 3 h or 24 h post-injection: \* $p < 5 \times 10^{-8}$ ; \*\* $p < 3 \times 10^{-12}$ .

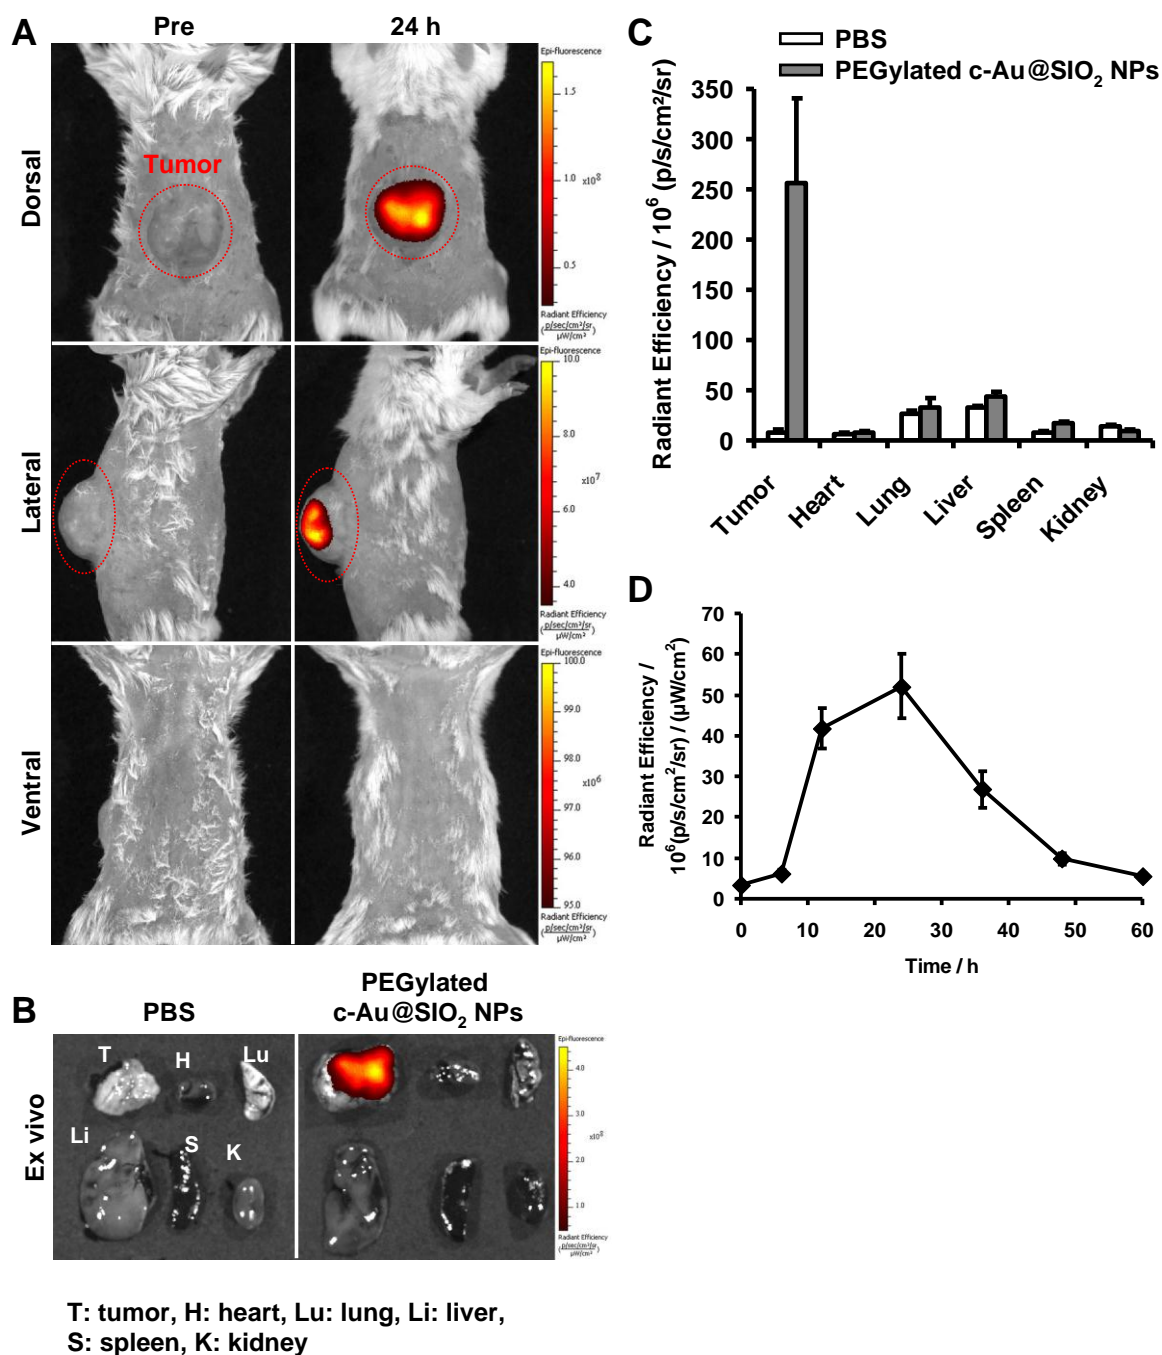

**Fig. S12** (A) In vivo fluorescence images of tumor-bearing mice before and 24 h after the intravenous injection of PEGylated c-Au@SiO<sub>2</sub> NPs. (B) Ex vivo fluorescence images 24 h after the injection of PBS and PEGylated c-Au@SiO<sub>2</sub> NPs (T: tumor, H: heart, Lu: lung, Li: liver, S: spleen, K: kidney). (C) Fluorescence intensities of major organs 24 h after the injection of PBS and PEGylated c-Au@SiO<sub>2</sub> NPs. (D) Temporal change in fluorescence intensity of the tumor area.

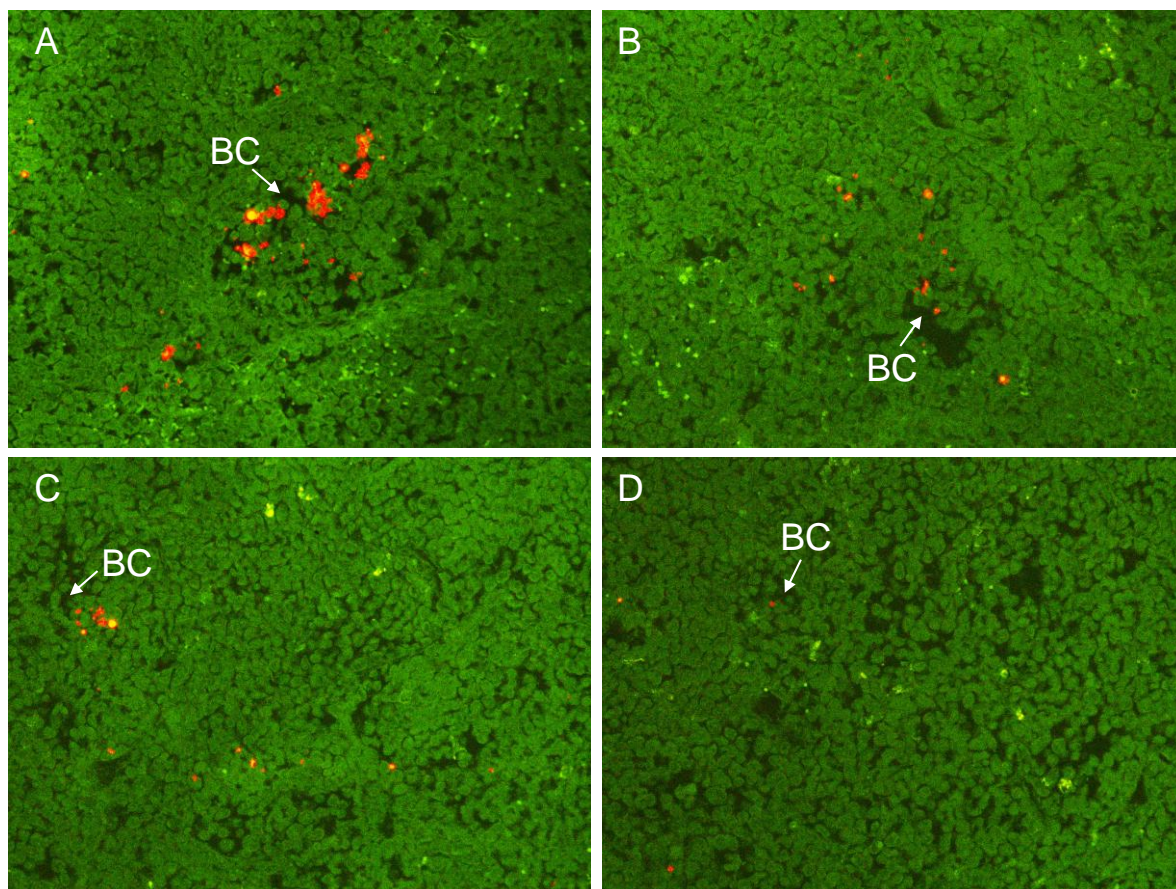

**Fig. 13** Fluorescence images in (A) the regions II, (B) III, (C) IV, (D) V in Fig. 1G (red: PEGylated c-Au@SiO<sub>2</sub> NPs, green: tissue autofluorescence, BC: blood capillaries).

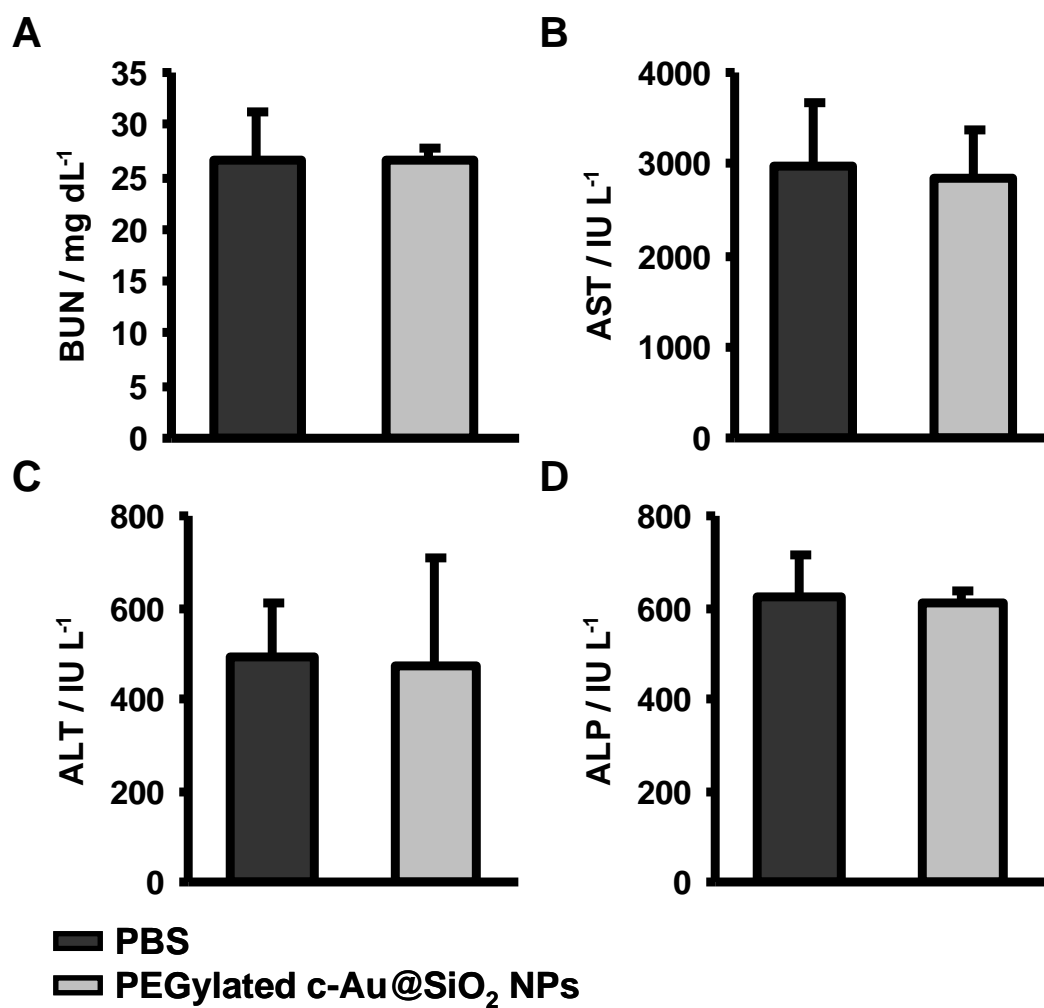

**Fig. S14** Biochemical assays in the sera of mice injected with PBS and PEGylated c-Au@SiO<sub>2</sub> NPs. (A) BUN, (B) AST, (C) ALT, and (D) ALP values were measured one month after injection.
